# Supplementary material for: Analysis of glycero-lysophospholipids in gastric cancerous ascites
Source: PubMed Central journal article supplement (PMC5392751; doi:10.1194/jlr.p072090), 2017-03-29
Supplement: 10.1194_P072090_jlr.P072090-1.pdf [file 10.1194_P072090_jlr.P072090-1.pdf]

## Supplemental Figure S1

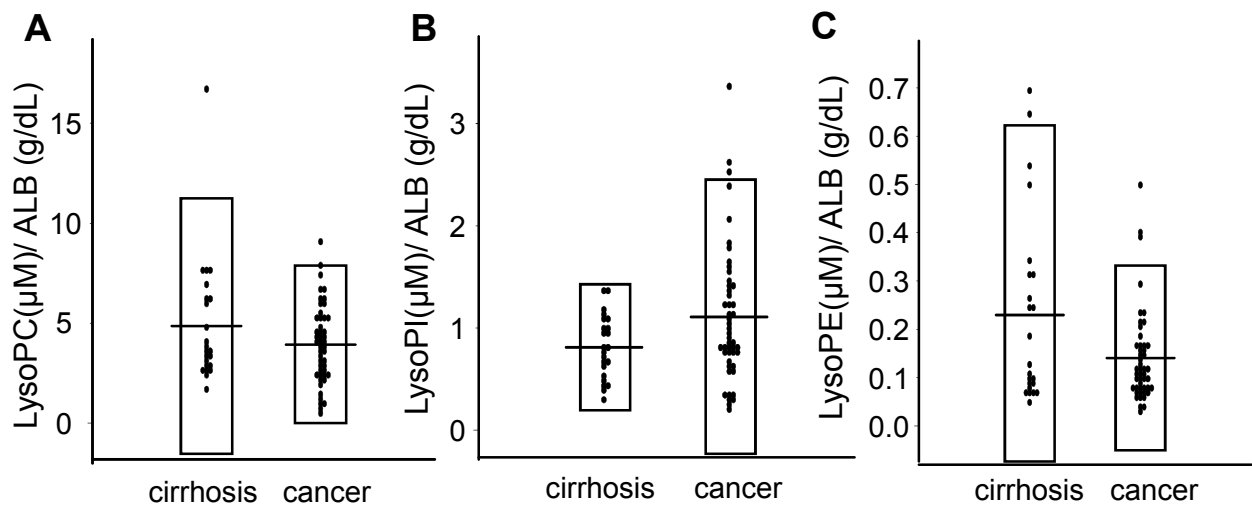

### Supplemental Figure S1. Glycerophospholipid levels in ascites from patients with cirrhosis or gastric cancer.

The glycerophospholipid levels were measured as described in Figure 1. (A) LysoPC levels adjusted according to the albumin level, (B) LysoPI levels adjusted according to the albumin level, and (C) LysoPE levels adjusted according to the albumin level.

## Supplemental Figure S2

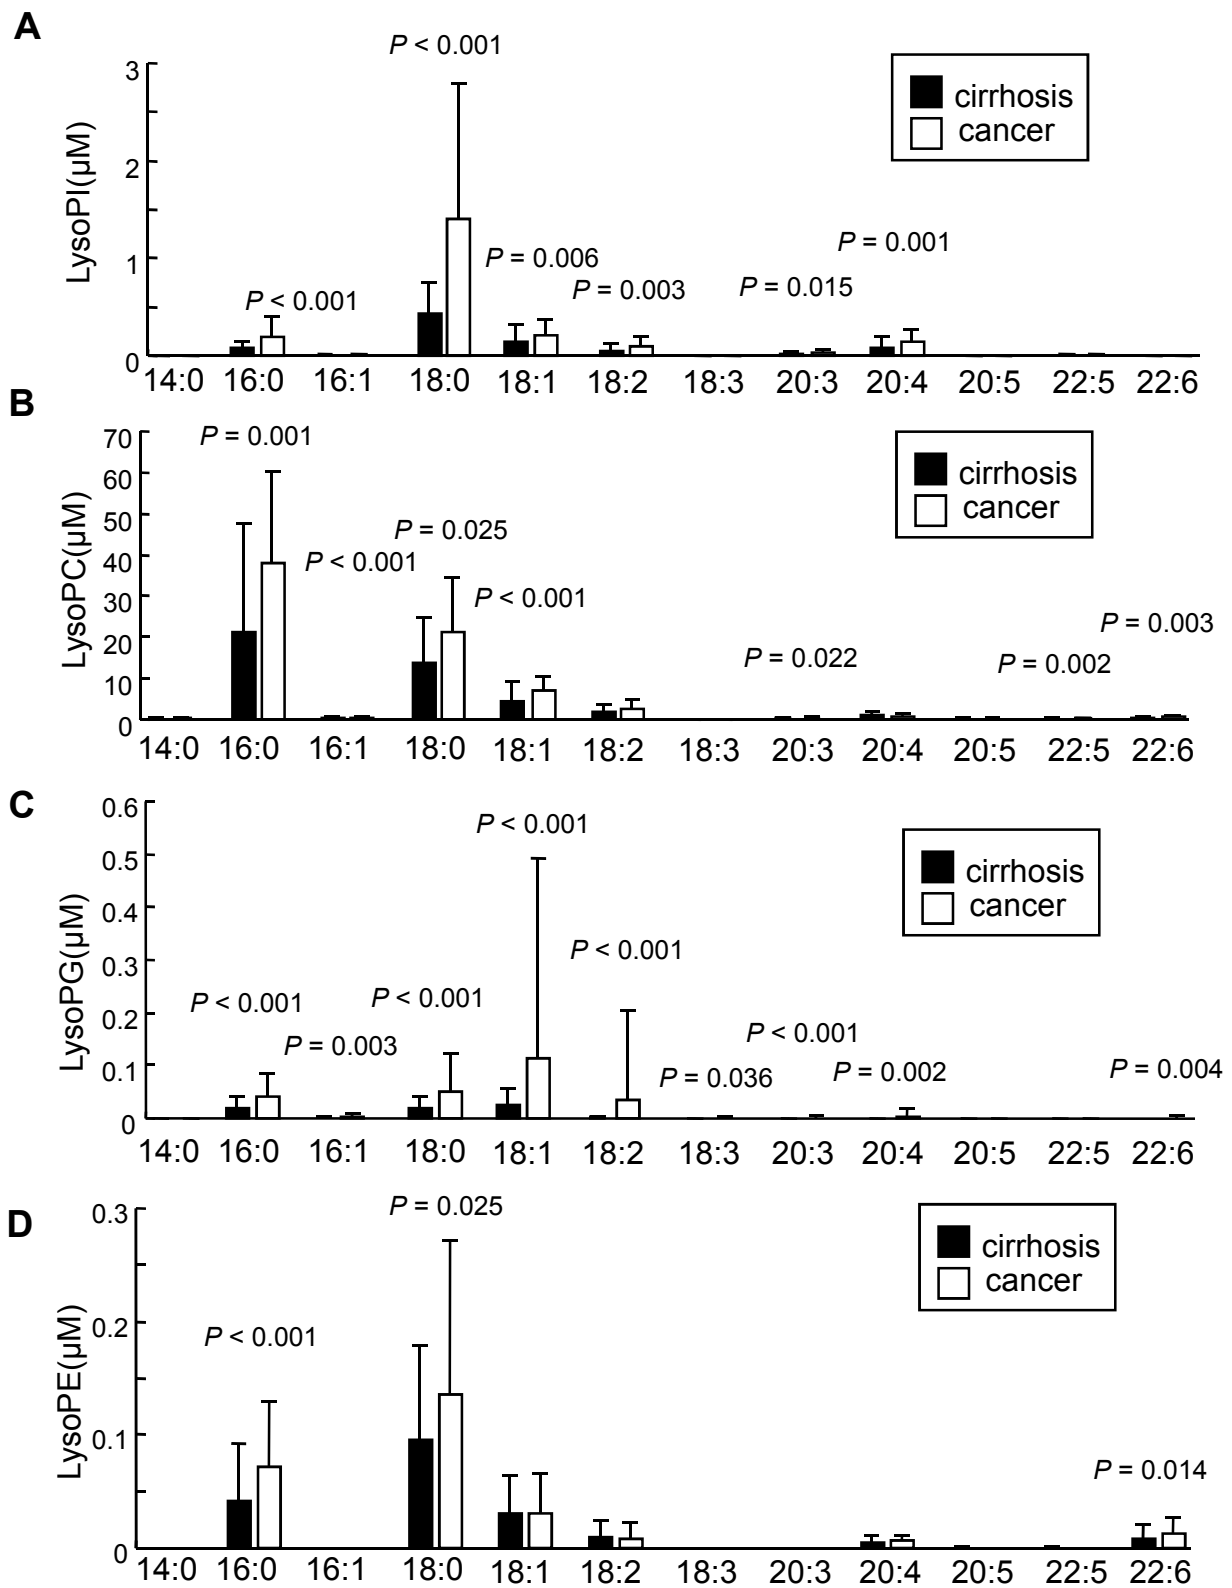

**Supplemental Figure S2. Glycerol-LPL species in ascites from patients with cirrhosis or gastric cancer.**

The levels of LysoPI species (A), LysoPC species (B), LysoPG species (C), and LysoPE species (D) were measured as described in Figure 1.

### Supplemental Figure S3

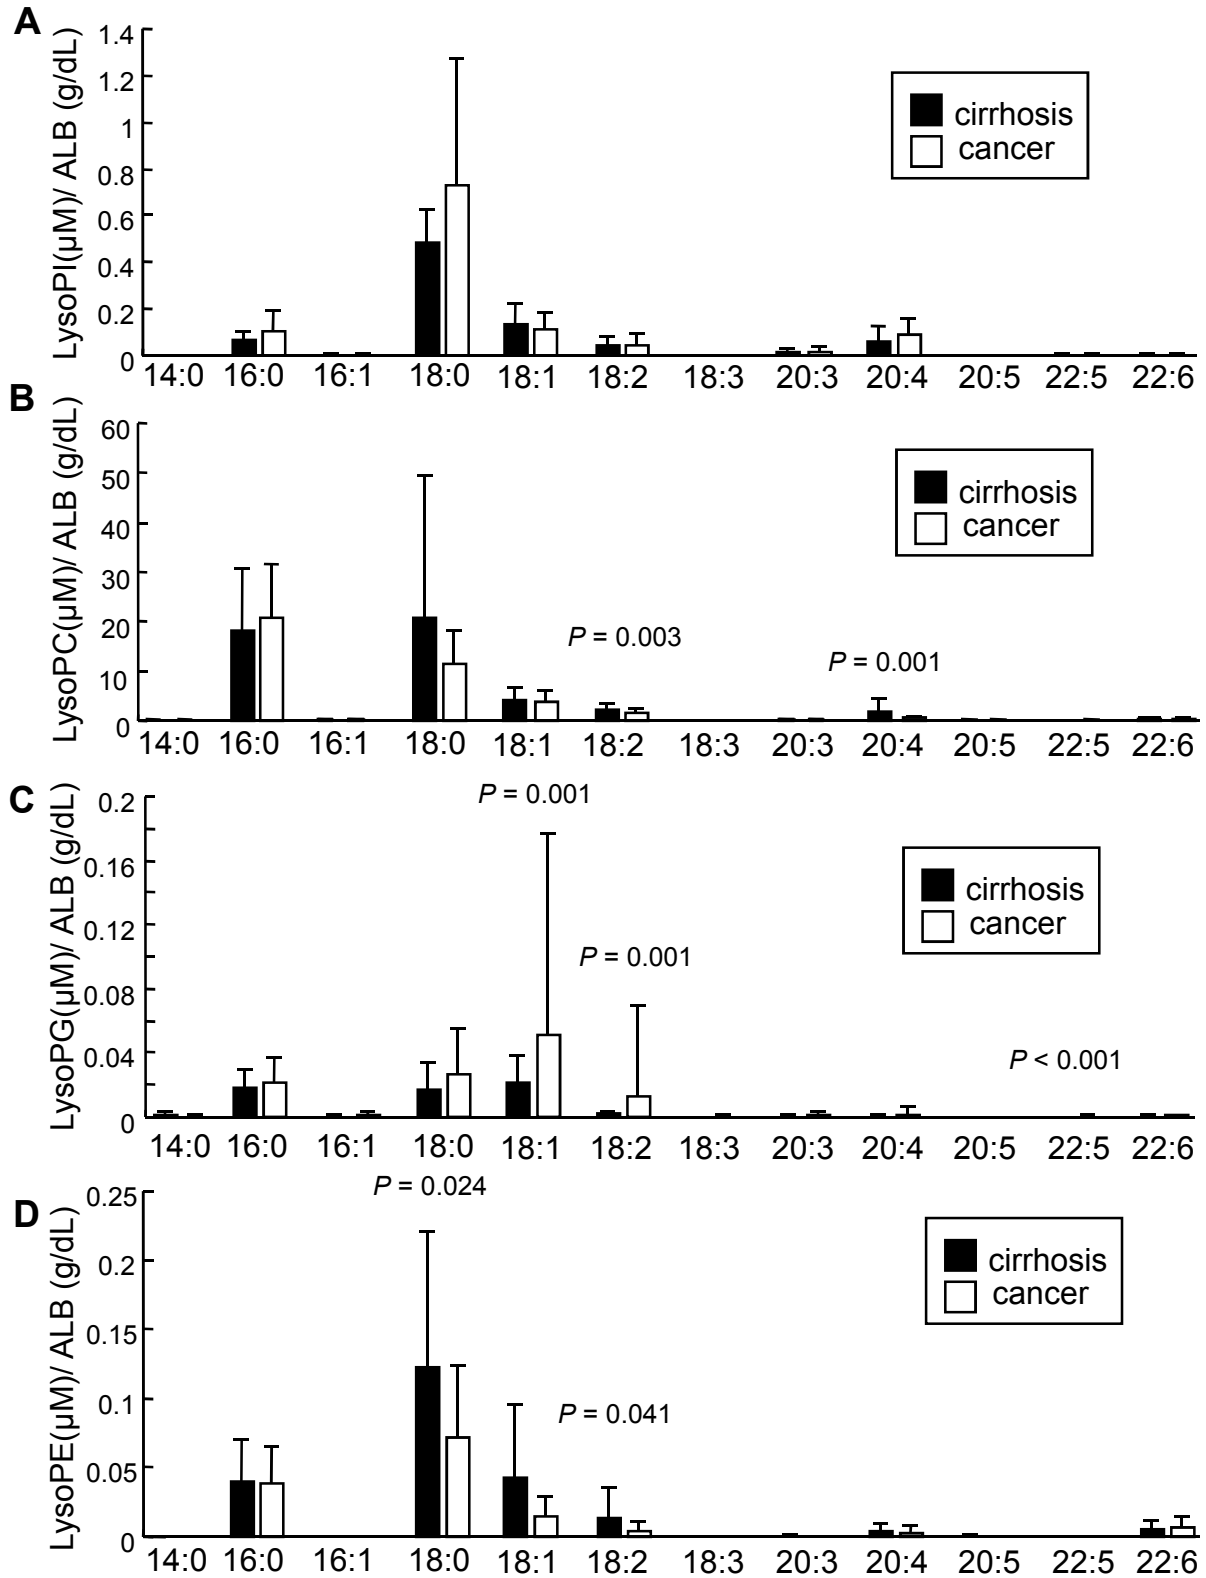

**Supplemental Figure S3. Glycero-LPL species adjusted according to the albumin level in ascites from patients with cirrhosis or gastric cancer.**

The levels of LysoPI species (A), LysoPC species (B), LysoPG species (C), and LysoPE species (D) were measured as described in Figure 1 and were adjusted according to the albumin level.

## Supplemental Figure S4

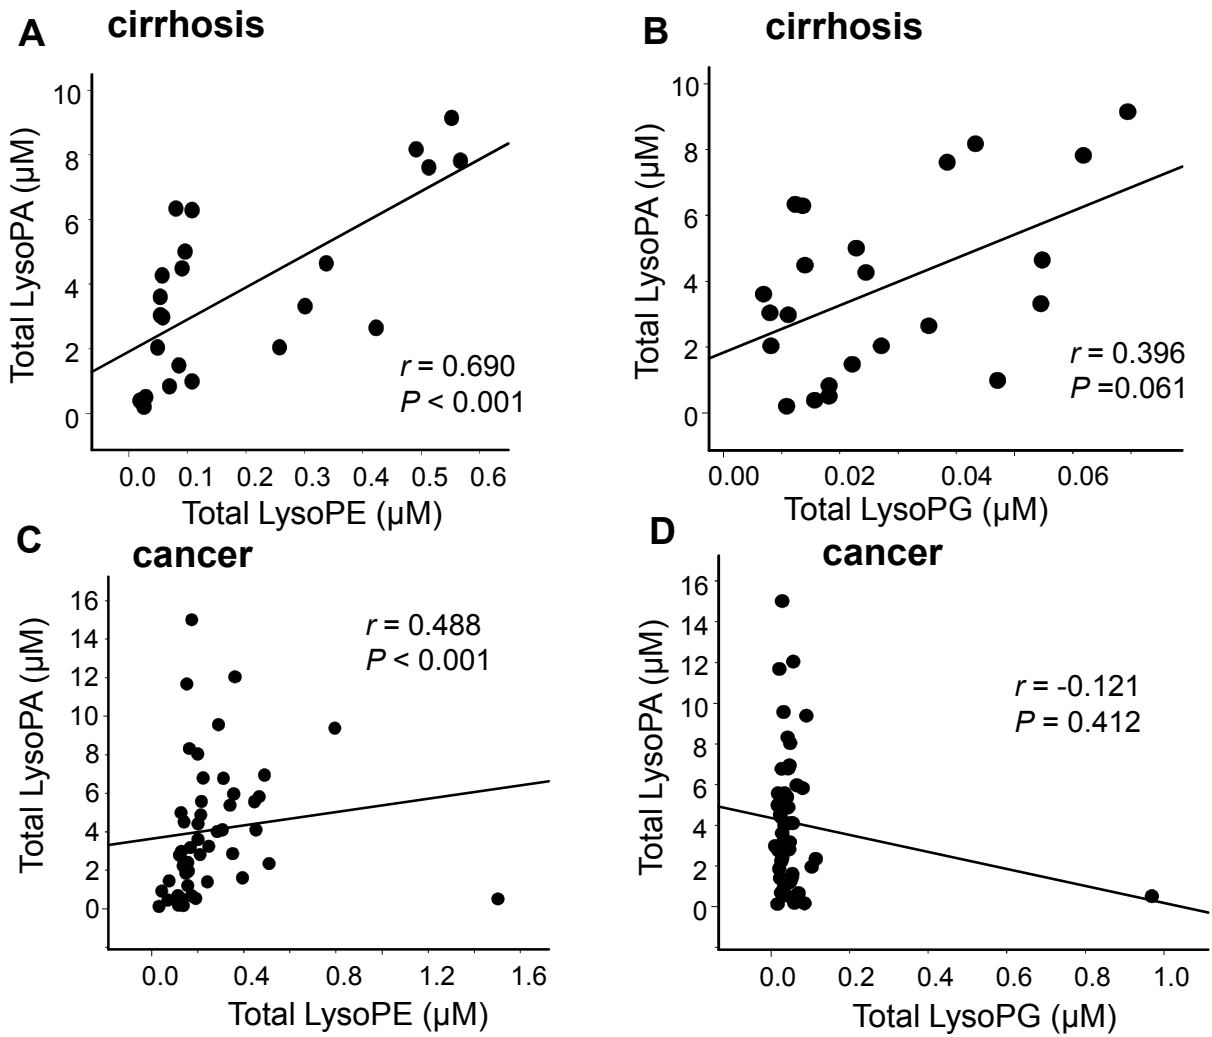

**Supplemental Figure S4. Correlation between total LysoPA and total LysoPE or LysoPG levels in ascites from patients with cirrhosis or gastric cancer.**

The correlations between the total LysoPA and total LysoPE (A, C) or total LysoPG (B, D) levels in ascites from patients with cirrhosis (A, B) or gastric cancer (C, D) are shown.

## Supplemental Figure S5

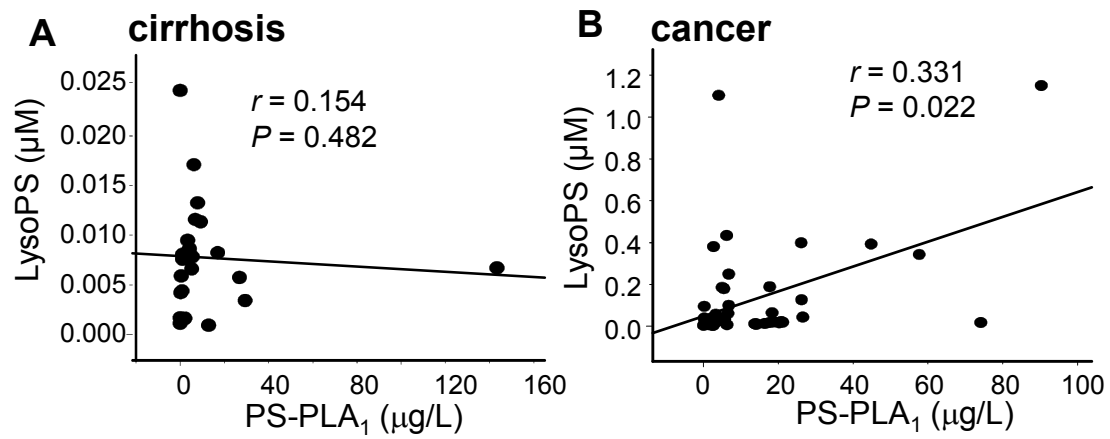

### Supplemental Figure S5. Correlation between total LysoPS and PS-PLA1 levels in ascites from patients with cirrhosis or gastric cancer.

The correlations between the total LysoPS and PS-PLA1 levels were investigated in patients with cirrhosis (A) or gastric cancer (B).

**Supplemental Table S1. Correlations between LysoPA molecular species and total ATX levels**

|             | cirrhosis |          | cancer   |          |
|-------------|-----------|----------|----------|----------|
|             | <i>r</i>  | <i>P</i> | <i>r</i> | <i>P</i> |
| 16:0 LysoPA | 0.809     | <0.001   | 0.256    | 0.079    |
| 16:1 LysoPA | 0.687     | <0.001   | 0.376    | 0.008    |
| 18:0 LysoPA | 0.796     | <0.001   | 0.218    | 0.137    |
| 18:1 LysoPA | 0.691     | <0.001   | 0.345    | 0.016    |
| 18:2 LysoPA | 0.668     | <0.001   | 0.508    | <0.001   |
| 20:4 LysoPA | 0.726     | <0.001   | 0.425    | 0.003    |
| 20:5 LysoPA | 0.620     | 0.002    | 0.484    | <0.001   |
| 22:5 LysoPA | 0.724     | <0.001   | 0.402    | 0.005    |
| 22:6 LysoPA | 0.669     | <0.001   | 0.467    | 0.001    |

The correlations between the LysoPA molecular species and the total ATX level were investigated using the Spearman correlation test.

**Supplemental Table S2. Correlations between LysoPA molecular species and glycerol-LPLs of the corresponding molecular species in ascites from patients with cirrhosis.**

|             | LysoPE | LysoPG | LysoPI | LysoPC | LysoPS |
|-------------|--------|--------|--------|--------|--------|
| 16:0 LysoPA | 0.671† | 0.775† | 0.890† | 0.786† |        |
| 18:0 LysoPA | 0.553† | 0.679† | 0.821† | 0.189  | 0.300  |
| 18:1 LysoPA | 0.479* | 0.767† | 0.835† | 0.819† | 0.519* |
| 18:2 LysoPA | 0.589† | 0.542† | 0.916† | 0.869  |        |
| 20:4 LysoPA | 0.571† | -0.192 | 0.606† | 0.189† |        |
| 22:6 LysoPA | 0.809† | 0.466* | 0.700† | 0.945† |        |

The correlations between the LysoPA molecular species and the glycerol-LPLs of the corresponding molecular species were investigated using the Spearman correlation test. \* $P < 0.05$ , † $P < 0.01$ .

**Supplemental Figure S3. Correlations between LysoPA molecular species and glycerol-LPLs of the corresponding molecular species in ascites from patients with gastric cancer.**

|             | LysoPE | LysoPG | LysoPI | LysoPC | LysoPS  |
|-------------|--------|--------|--------|--------|---------|
| 16:0 LysoPA | 0.427† | 0.192  | 0.437† | 0.524† |         |
| 18:0 LysoPA | 0.411† | 0.145  | 0.550† | 0.517  | -0.281  |
| 18:1 LysoPA | 0.235  | -0.111 | 0.417† | 0.587† | -0.562† |
| 18:2 LysoPA | 0.504† | -0.245 | 0.515† | 0.705† |         |
| 20:4 LysoPA | 0.571† | -0.192 | 0.606† | 0.189  |         |
| 22:6 LysoPA | 0.733† | -0.062 | 0.581† | 0.773† |         |

The correlations between the LysoPA molecular species and the glycerol-LPLs of the corresponding molecular species were investigated using the Spearman correlation test. \* $P < 0.05$ , † $P < 0.01$
